# Supplementary material for: An efficient targeted nuclease strategy for high-resolution mapping of DNA binding sites
Source: eLife journal article supplement (doi:10.7554/elife.21856), 2017-01-16
Supplement: supp [file elife-21856-supp-v1.zip]

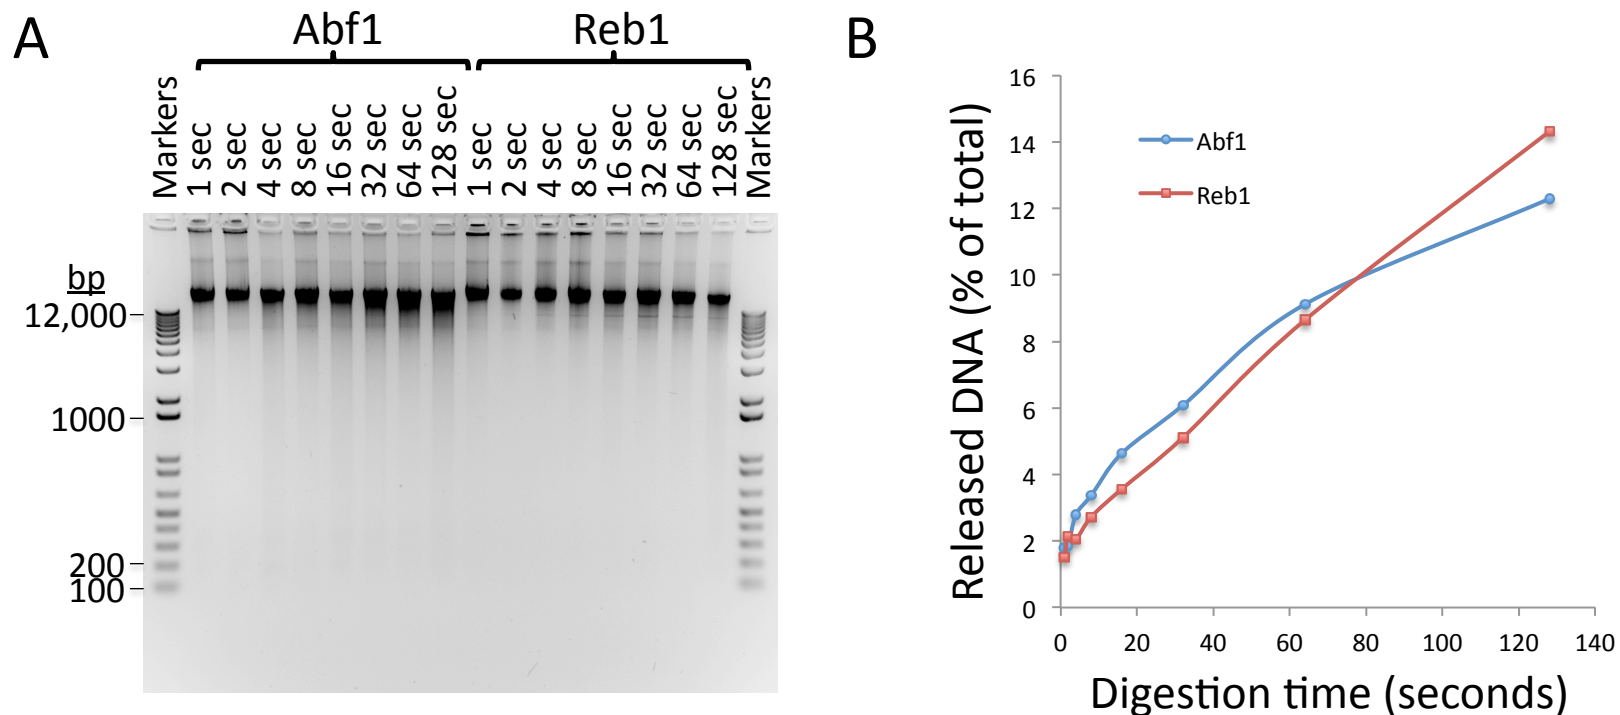

**Figure 1—figure supplement 2. Kinetics of CUT&RUN DNA release.**

(A) Electrophoresis on a 1% agarose gel of DNA from the pellet fractions (10  $\mu$ L per sample) over a 1-128 second digestion time series at 0° C for the two yeast TFs described in this study. As these sites are on average ~10-kb apart in the yeast genome a gradual decrease in fragment size can be observed with time of digestion from 1 second to 128 seconds for both Abf1 and Reb1. Note that the average distance between CTCF sites in the human genome is too large to observe cleavages using a conventional gel assay. (B) Percent release of DNA based on Picogreen fluorescence measurements:  $[\text{Supn}]/([\text{Supn}]+[\text{Pellet}]) \times 100$ . Total yield ~500 ng/sample.
