# Supplementary material for: An efficient targeted nuclease strategy for high-resolution mapping of DNA binding sites
Source: eLife journal article supplement (doi:10.7554/elife.21856), 2017-01-16
Supplement: supp [file elife-21856-supp-v1.zip]

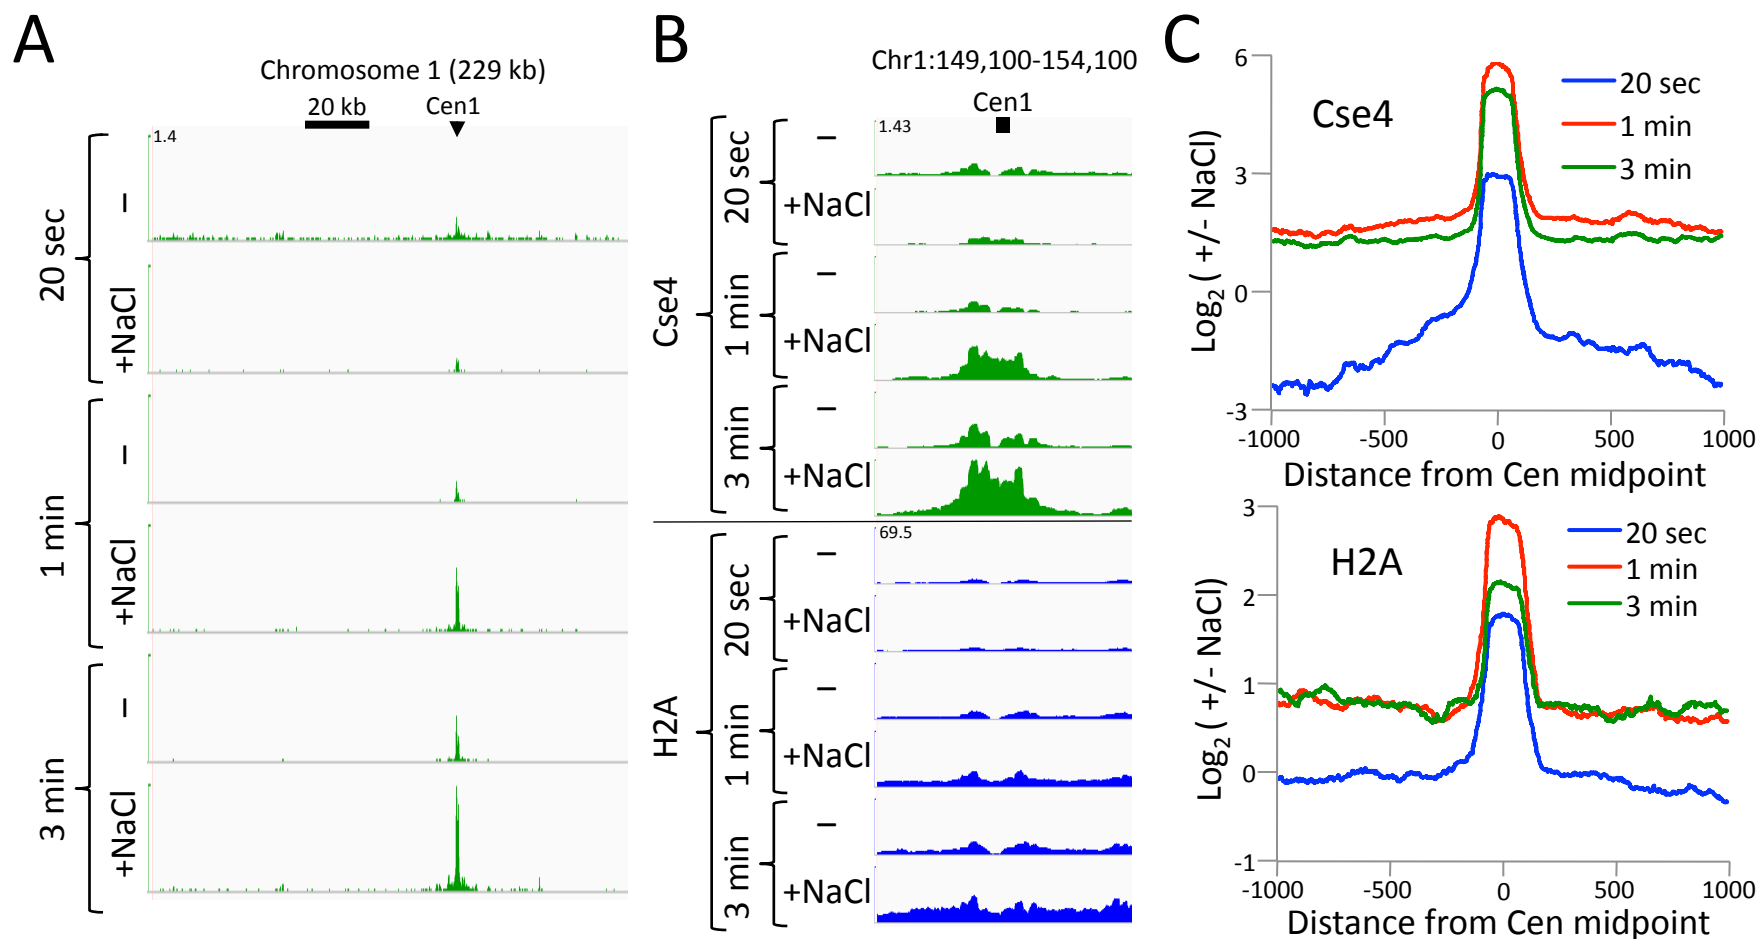

**Figure 5-figure supplement 1. CUT&RUN maps the rare highly insoluble *S. cerevisiae* kinetochore complex.**

(A) After antibody and pA-MN addition, samples were split in half, pA-MN was activated with calcium, and the reaction stopped with either the standard 100 mM NaCl buffer (-) or a buffer containing 2M NaCl (+). Tracks are displayed for Chromosome 1 using spike-in normalization to reflect absolute recovery. (B) Close-up views of Cse4 and log-ratios of Cse4 and H2A high-salt versus low-salt extracted fragments. (C) Log-ratios of high-salt versus low-salt extracted fragments for the medians of all 16 *S. cerevisiae* centromeres aligned around their midpoints.
