# Supplementary material for: An efficient targeted nuclease strategy for high-resolution mapping of DNA binding sites
Source: eLife journal article supplement (doi:10.7554/elife.21856), 2017-01-16
Supplement: supp [file elife-21856-supp-v1.zip]

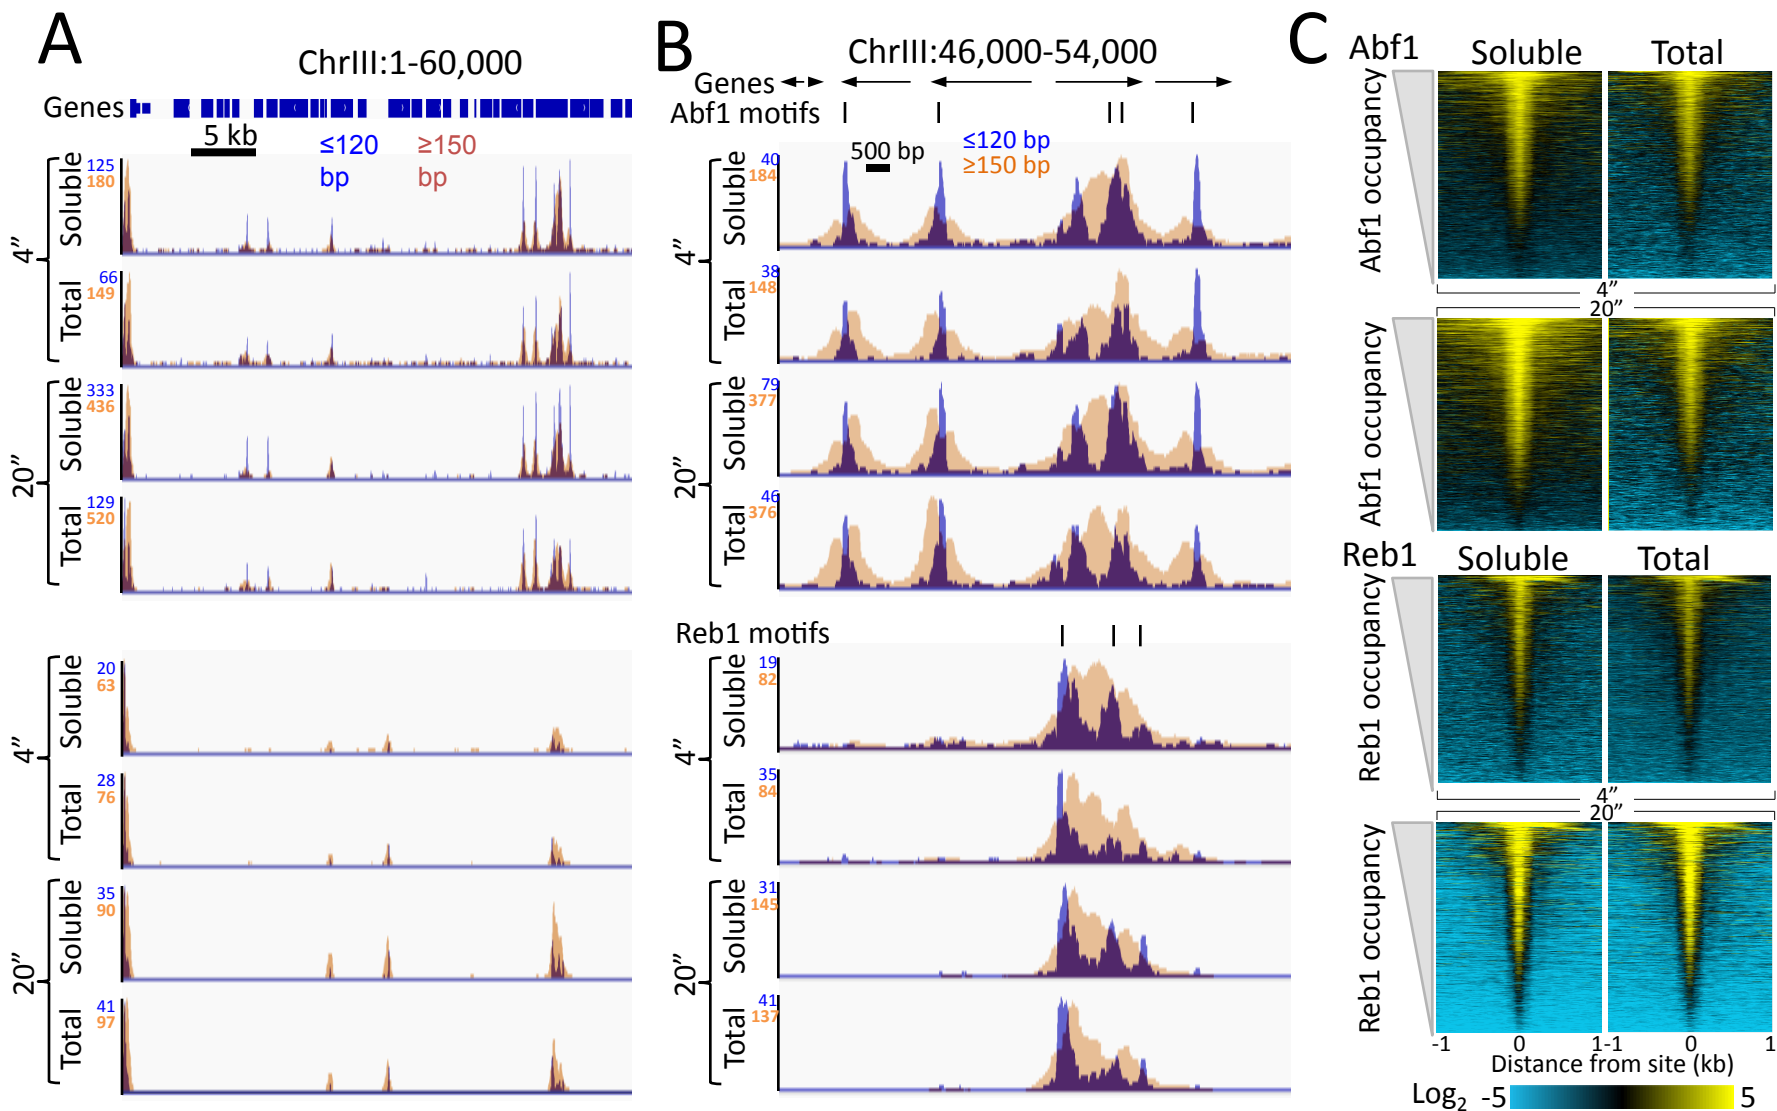

**Figure 1–figure supplement 3. Quantitative recovery of bound TFs in supernatants.** (A) A comparison of Abf1 and Reb1 heat maps of CUT&RUN data from a single experiment as described in the legend to Figure 1D, except comparing the supernatant fraction (Soluble) to Total DNA after removal of large fragments on Ampure beads. (B) Expanded region of high TF occupancy in (A). (C) Heat map alignments of CUT&RUN ≤120 bp digestion data to motifs and ordering by TF occupancy was performed as described in the legend to Fig. 2, except with log scaling and Contrast = 5, centered on 2.
