# Supplementary material for: An efficient targeted nuclease strategy for high-resolution mapping of DNA binding sites
Source: eLife journal article supplement (doi:10.7554/elife.21856), 2017-01-16
Supplement: supp [file elife-21856-supp-v1.zip]

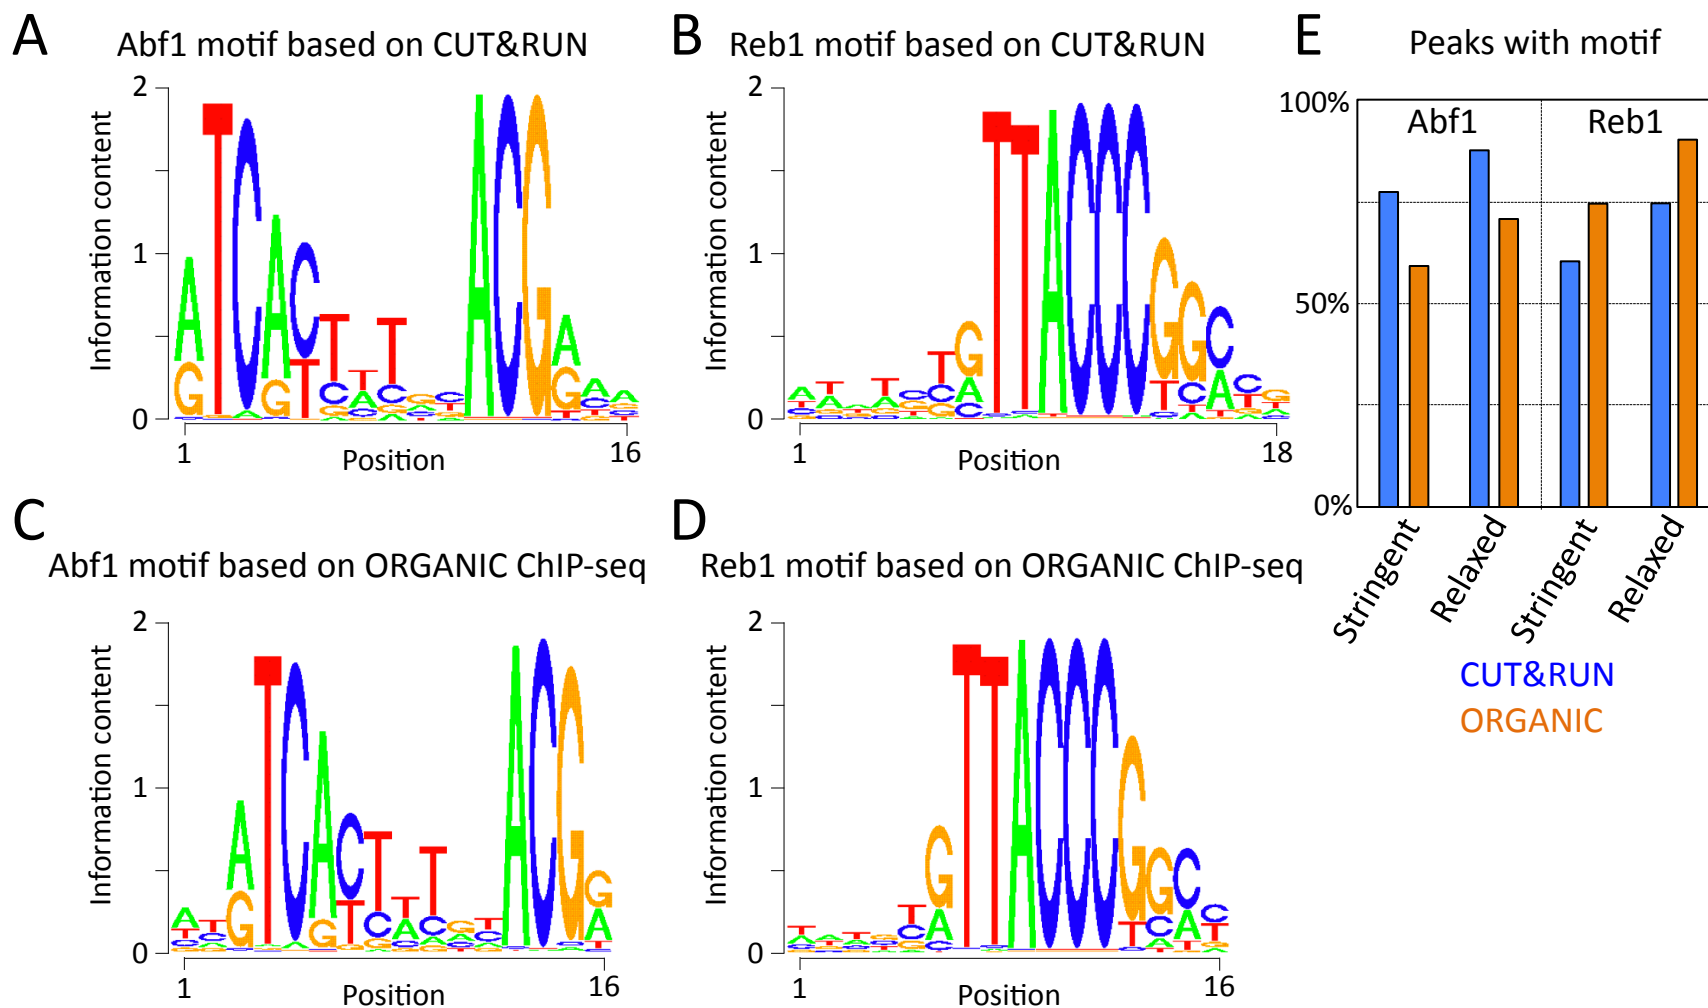

**Figure 1–figure supplement 4. Abf1 and Reb1 motifs based on CUT&RUN and ORGANIC ChIP-seq are similar.**

The MEME motif-finding program was applied to (A-B) 1''-32'' pooled CUT&RUN  $\leq 120$  bp data and (C) 600 mM Abf1 and (D) 80 mM Reb1 ORGANIC data, and log-odds sequence logos are shown. Note the close correspondence between motifs determined using CUT&RUN and ORGANIC. (E) Percentage of peak calls with motifs. For each  $\leq 120$  bp dataset, peaks were called using thresholds set to recover similar numbers of peaks (stringent  $\sim 650$  and relaxed  $\sim 1100$ ).
