# Supplementary material for: An efficient targeted nuclease strategy for high-resolution mapping of DNA binding sites
Source: eLife journal article supplement (doi:10.7554/elife.21856), 2017-01-16
Supplement: supp [file elife-21856-supp-v1.zip]

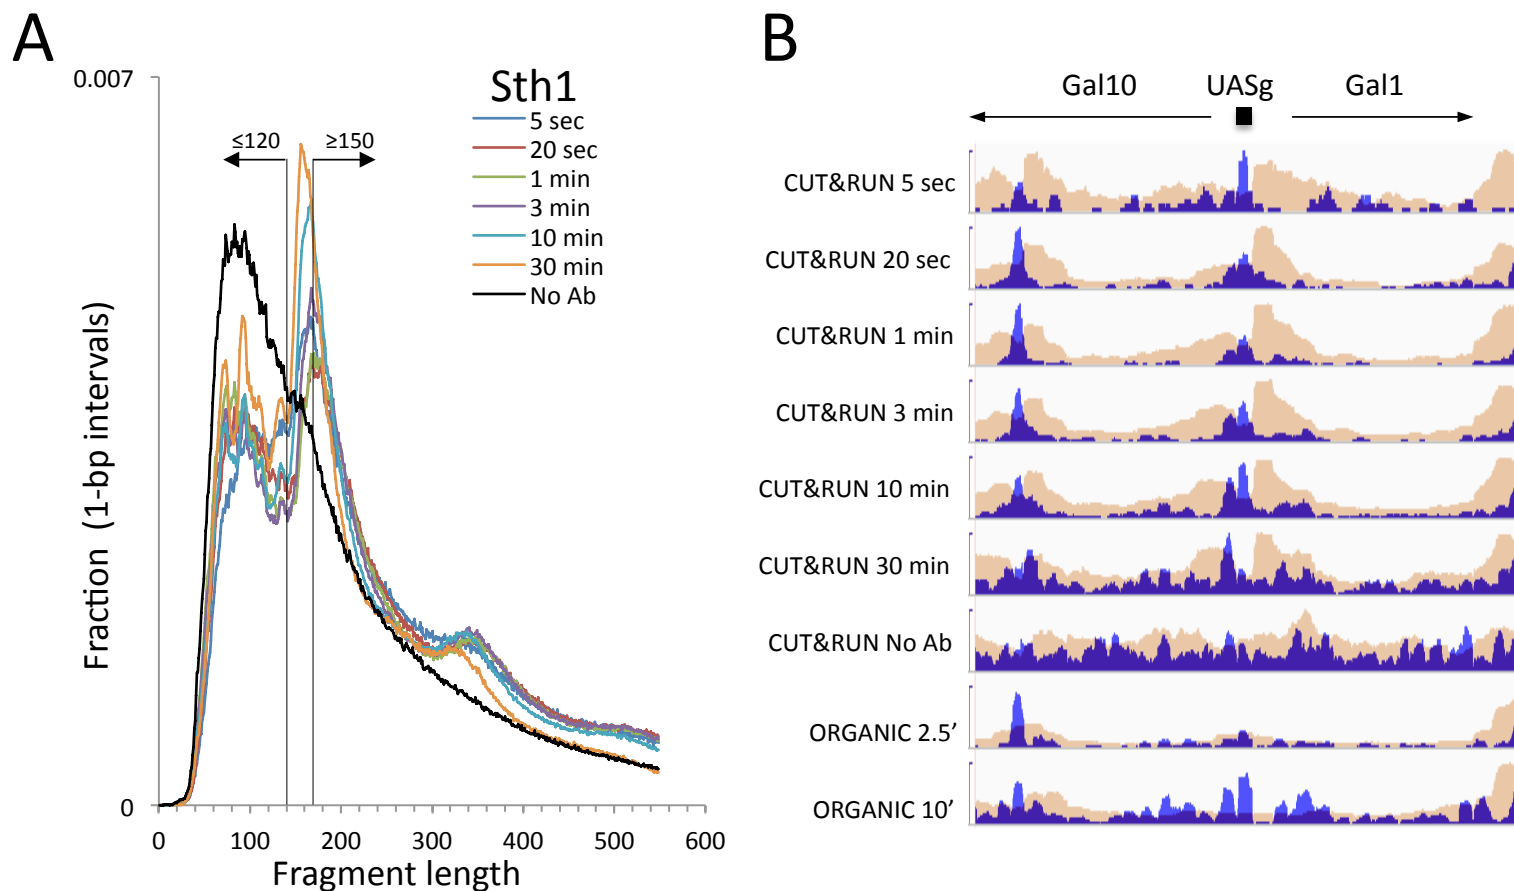

**Figure 4-figure supplement 2. CUT&RUN and ORGANIC profiles for Sth1.**

(A) Length distributions of Sth1 CUT&RUN Ampure-bead filtered total DNA fragments normalized such that there is equal areas under the curves. Uniform digestion and release is observed over the time-course. Data are combined from two biological replicates. No anti-FLAG primary antibody (No Ab) (B) Tracks of the Gal1-Gal4 region (ChrII:276,000-281,000) showing concordance with the mapping of RSC to the Gal4 UAS (UASg, Floer et al. *Cell* 141:407-18, 2010).
