# Supplementary material for: An efficient targeted nuclease strategy for high-resolution mapping of DNA binding sites
Source: eLife journal article supplement (doi:10.7554/elife.21856), 2017-01-16
Supplement: supp [file elife-21856-supp-v1.zip]

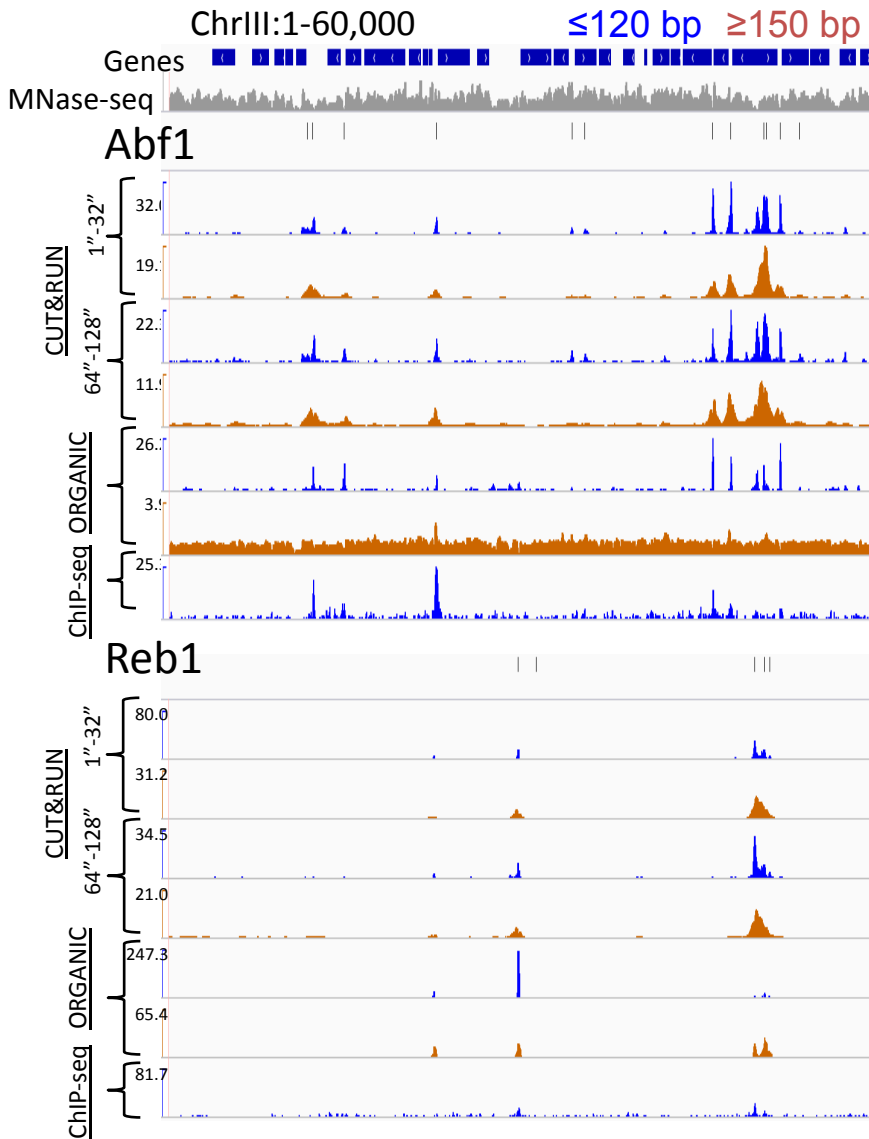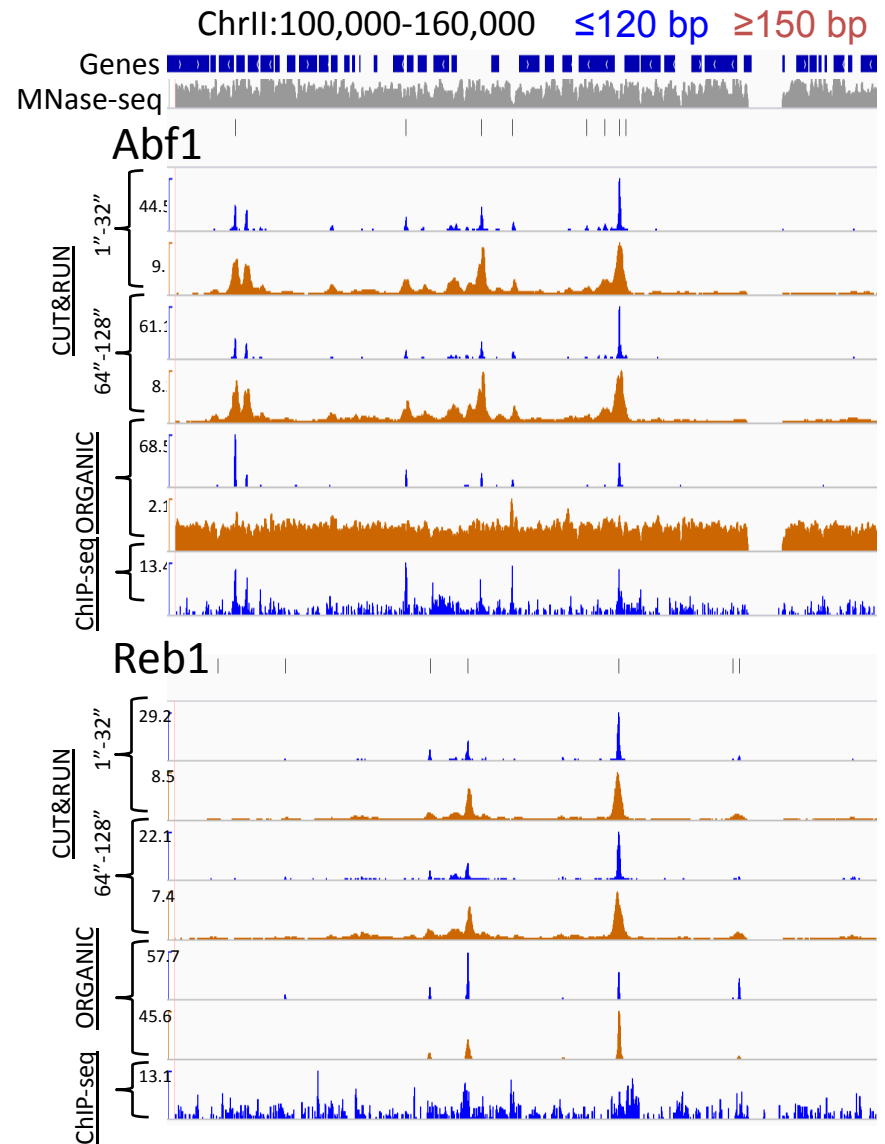

**Figure 1—figure supplement 1. CUT&RUN and ORGANIC ChIP produce qualitatively similar TF occupancy profiles.**

Representative examples of Abf1 and Reb1 profiles for CUT&RUN data pooled from the 1" to 32" and the 64" and 128" time-course samples, ORGANIC and standard ChIP-seq, for ≤120-bp and ≥150-bp fragment lengths. Ticks mark the location of significant Abf1 (upper) and Reb1 (lower) motifs. The Y-axis was autoscaled within each region by IGV.
