# Supplementary material for: An efficient targeted nuclease strategy for high-resolution mapping of DNA binding sites
Source: eLife journal article supplement (doi:10.7554/elife.21856), 2017-01-16
Supplement: supp [file elife-21856-supp-v1.zip]

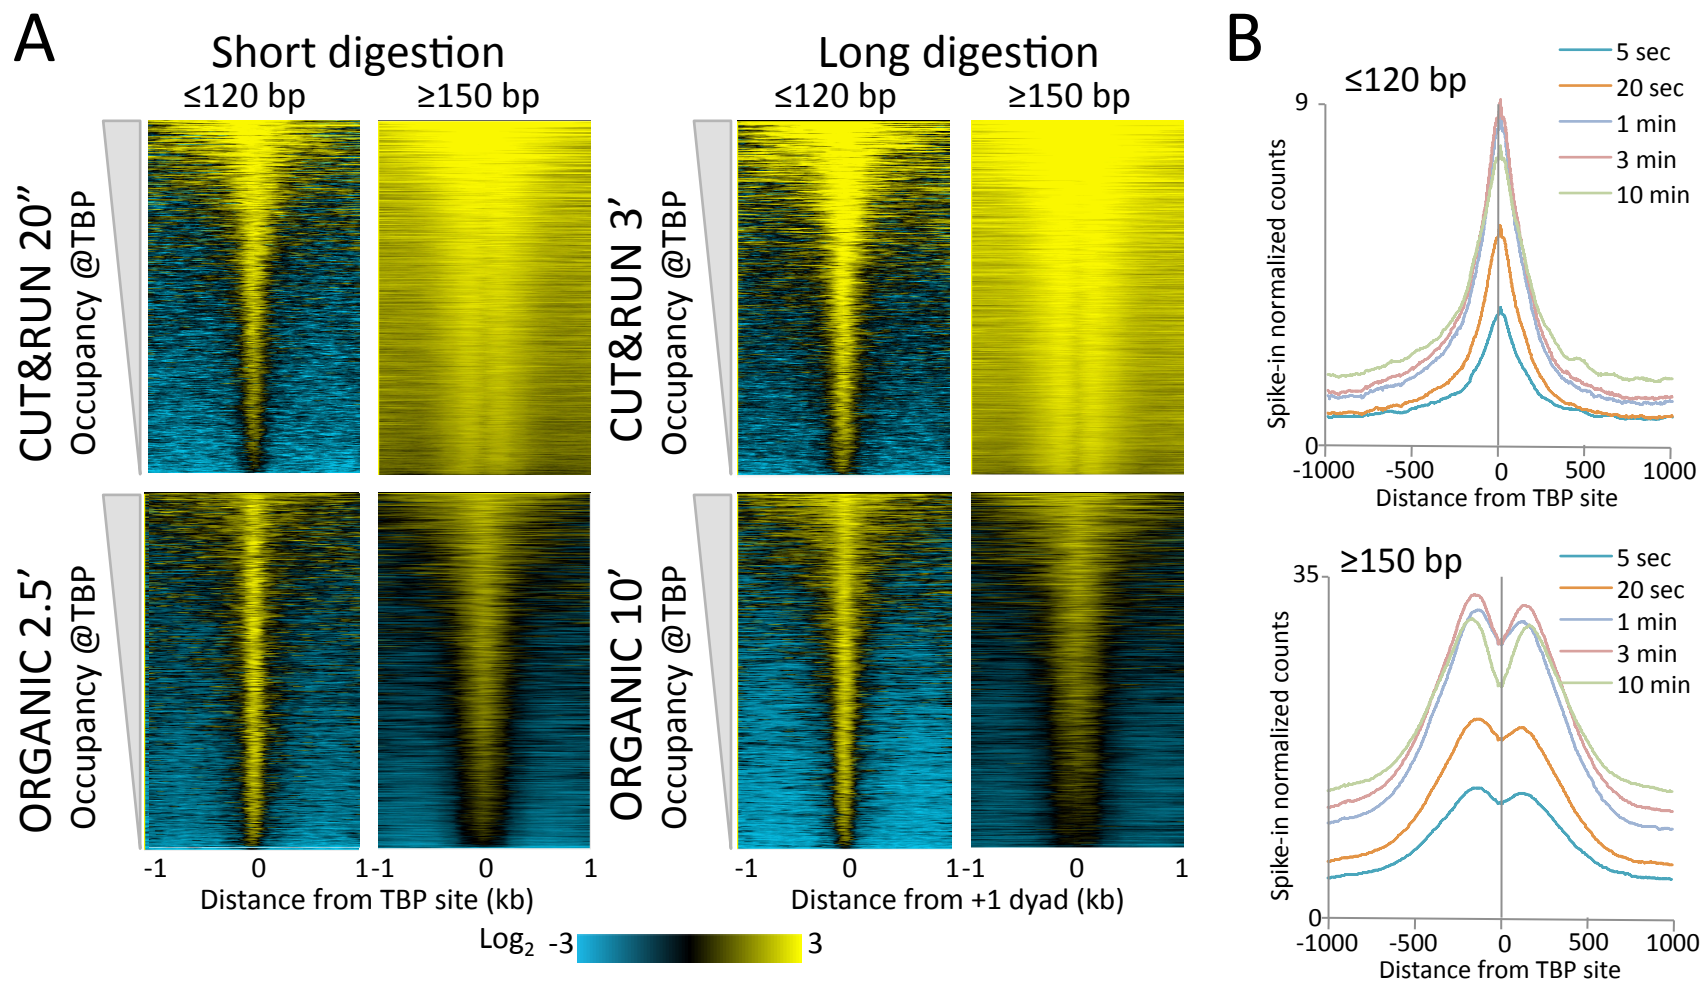

**Figure 4–figure supplement 1. CUT&RUN and ORGANIC profiles for Mot1.**

(A) Heat maps of two CUT&RUN and two ORGANIC time points aligned around TBP sites and ordered by increasing Mot1 occupancy over the 2 kb region surrounding each site. (B) Occupancy profiles for Mot1 CUT&RUN digestion over a 120-fold range, spike-in normalized, showing absolute quantitation.
