# Supplementary material for: An efficient targeted nuclease strategy for high-resolution mapping of DNA binding sites
Source: eLife journal article supplement (doi:10.7554/elife.21856), 2017-01-16
Supplement: supp [file elife-21856-supp-v1.zip]

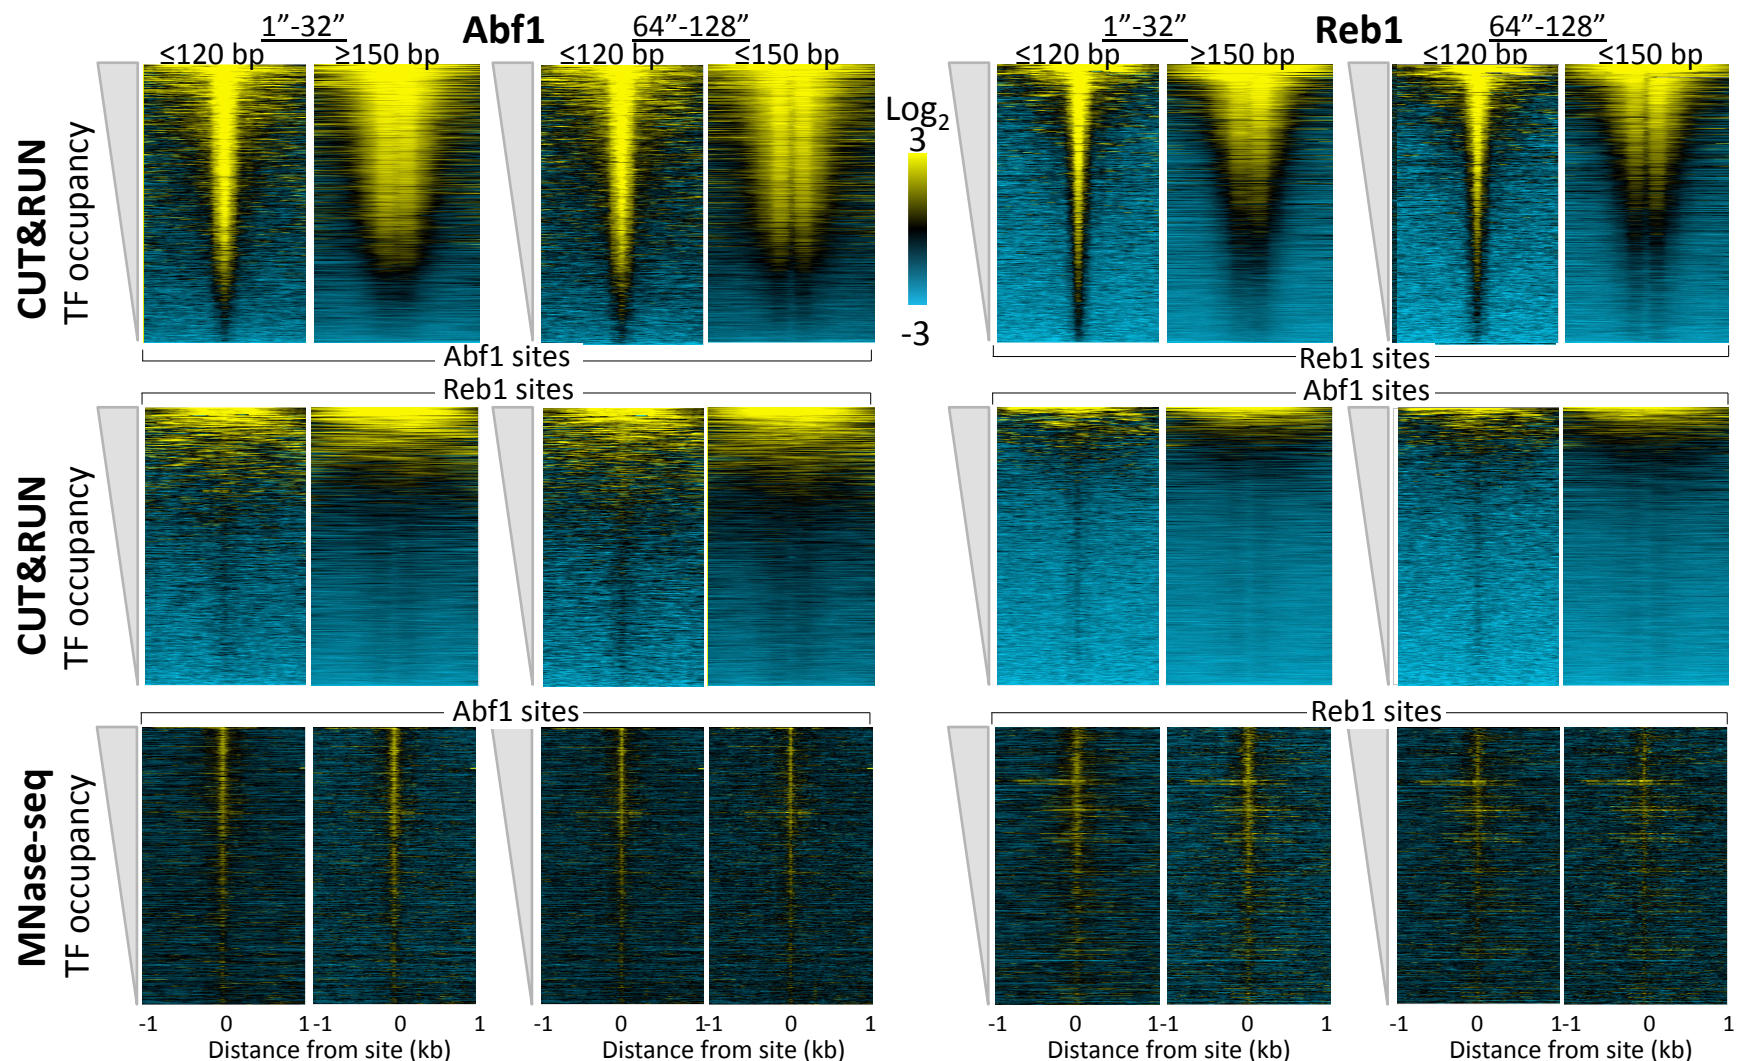

**Figure 2–figure supplement 1. CUT&RUN reveals cleavage kinetics *in situ*.**

A comparison of Abf1 (left) and Reb1 (right) heat maps of CUT&RUN data from a single experiment (20160630), pooling the 1" to 32" and the 64" and 128" time-course samples, and separated into ≤120 bp (left) and ≥150 bp (right) size classes. Alignments to motifs and ordering by TF occupancy was performed as described in the legend to Fig. 3, except that Treeview was used with log scaling and contrast=3. Note that with increased digestion time, more of the TFs are released, deepening the "hole" of ≥150 bp fragments without any noticeable change in dynamic range. CUT&RUN shows a much higher dynamic range than MNase-seq for particle detection (compare top panels with bottom panels). MNase-seq data are from Henikoff, JG et al. (2011) *PNAS* 108:18318-23.
