# Supplementary material for: An efficient targeted nuclease strategy for high-resolution mapping of DNA binding sites
Source: eLife journal article supplement (doi:10.7554/elife.21856), 2017-01-16
Supplement: supp [file elife-21856-supp-v2.zip]

Archive with 14 entries (14 files):
- elife_poa_e21856_Figure_1_figure_supplement_1.pdf
- elife_poa_e21856_Figure_7_figure_supplement_1.pdf
- elife_poa_e21856_Figure_1_figure_supplement_4.pdf
- elife_poa_e21856_Figure_2_figure_supplement_1.pdf
- elife_poa_e21856_Figure_6_figure_supplement_4.pdf
- elife_poa_e21856_Figure_4_figure_supplement_1.pdf
- elife_poa_e21856_Figure_6_figure_supplement_3.pdf
- elife_poa_e21856_Figure_7_figure_supplement_2.pdf
- elife_poa_e21856_Figure_1_figure_supplement_2.pdf
- elife_poa_e21856_Figure_5_figure_supplement_1.pdf
- elife_poa_e21856_Figure_4_figure_supplement_2.pdf
- elife_poa_e21856_Figure_6_figure_supplement_1.pdf
- elife_poa_e21856_Figure_6_figure_supplement_2.pdf
- elife_poa_e21856_Figure_1_figure_supplement_3.pdf
